# Supplementary material
Source: PubMed Central journal article supplement (PMC7115834)
Supplement: EMS86629-supplement-Supplementary_Material_2.pdf [file EMS86629-supplement-Supplementary_Material_2.pdf]

# Full unedited gel for Figure 1C

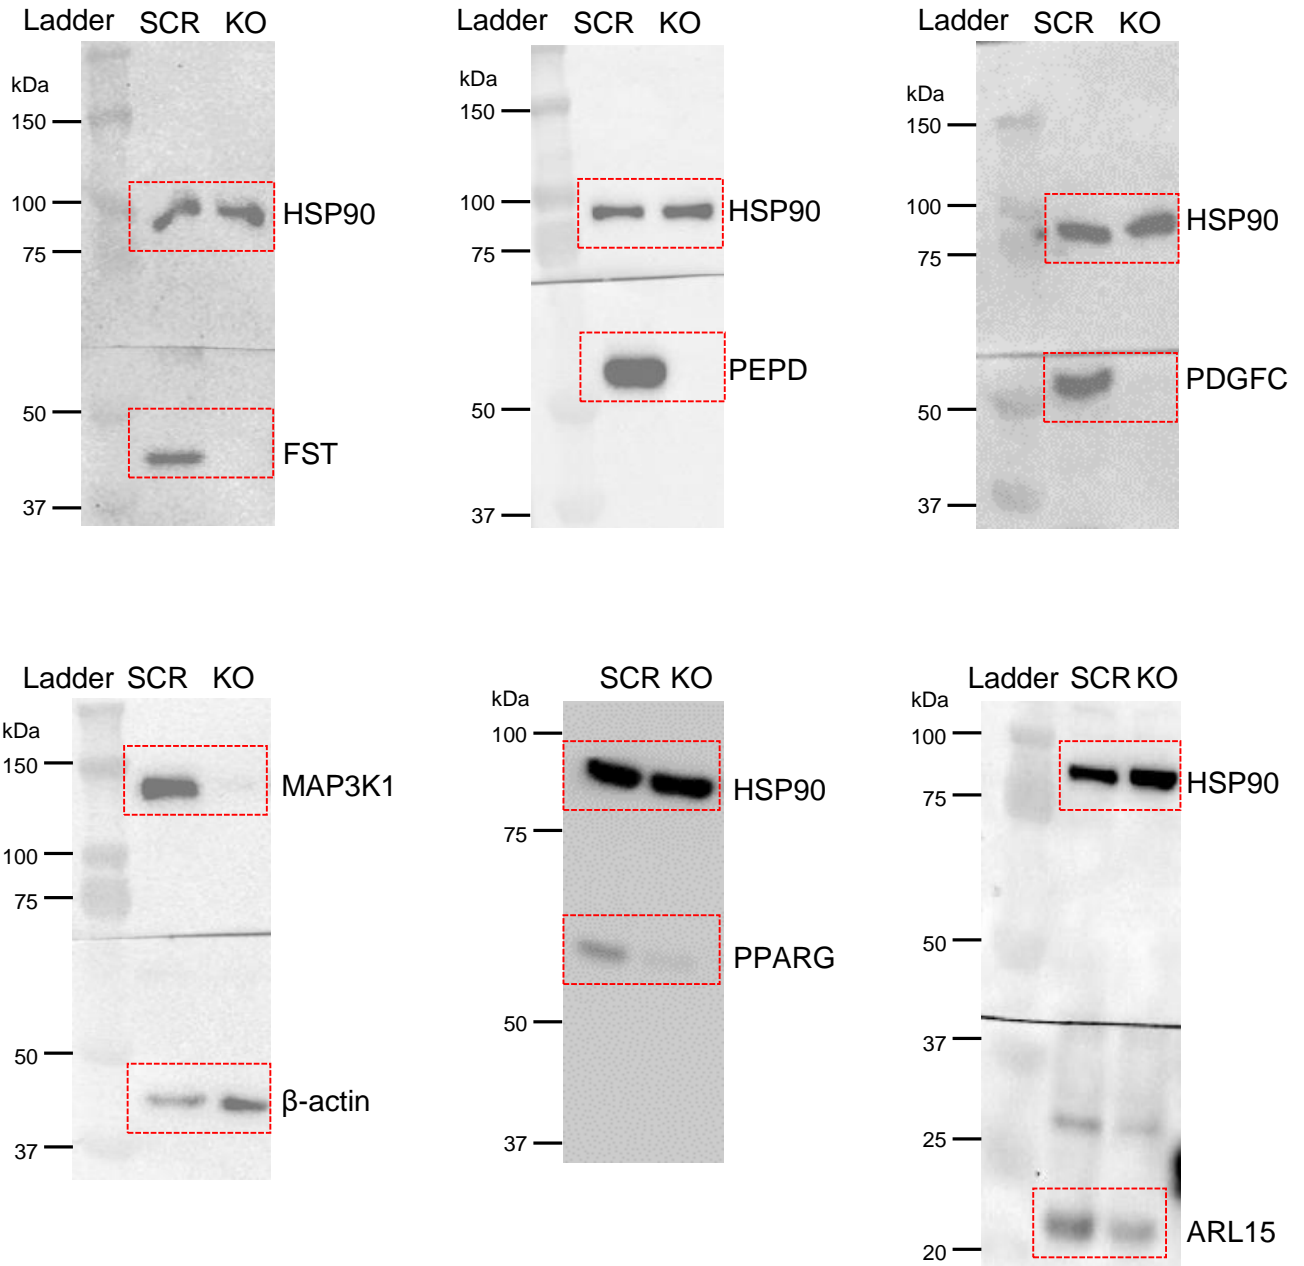

The red dashed square indicates where it was cropped.

## Full unedited gel for Figure 6

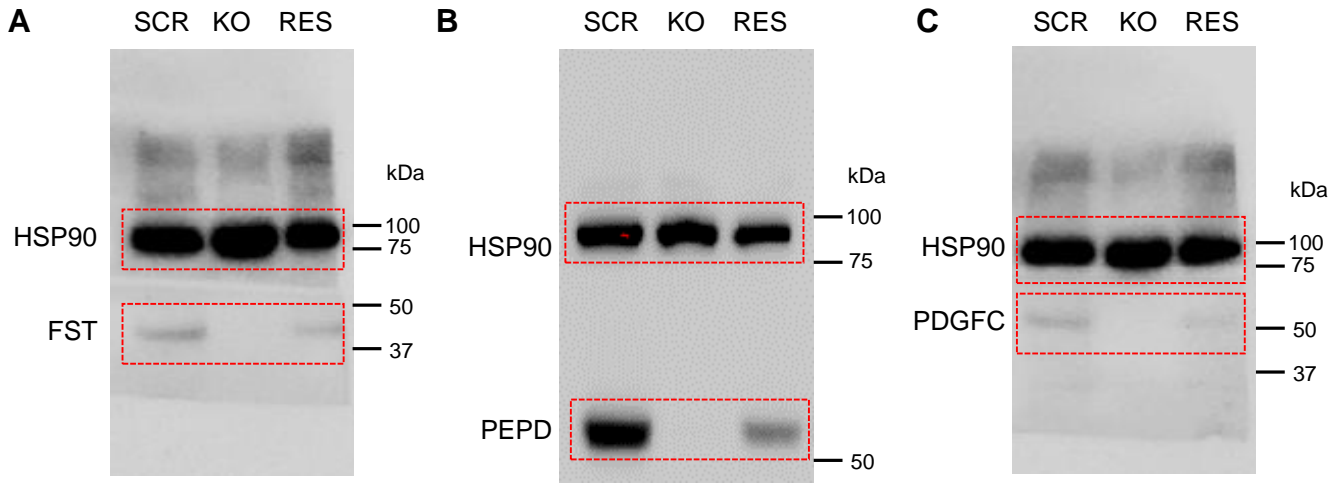

## Full unedited gel for Figure 4A and Online Figure IV

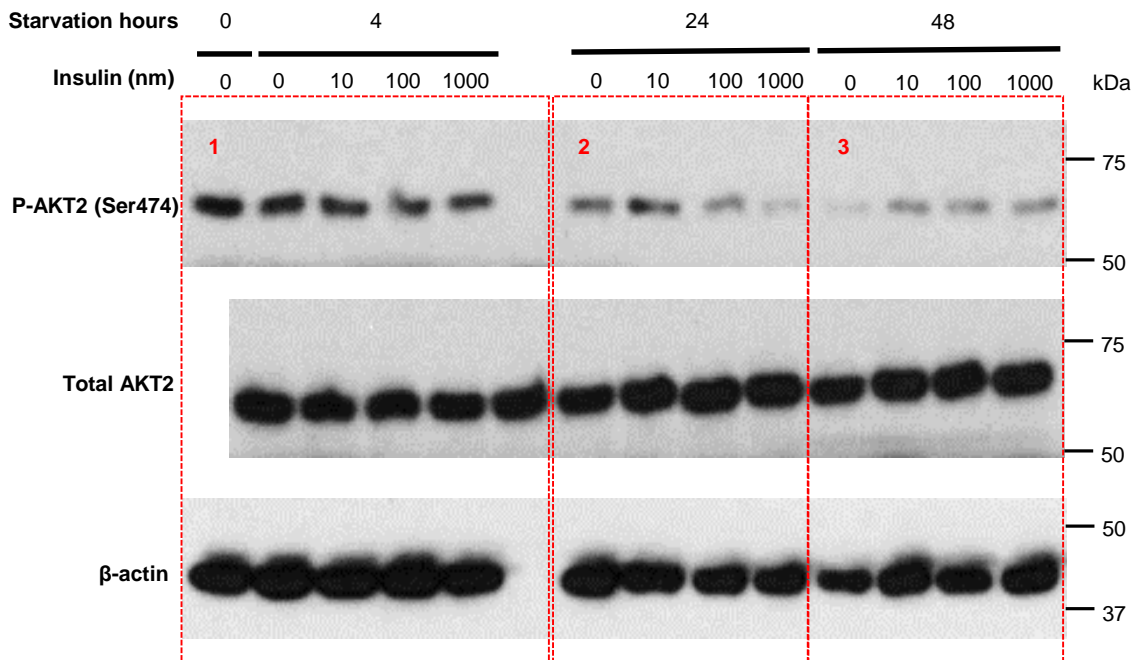

**Figure 4A**

Online Figure IV shows the full experimental results of optimizing the condition for insulin treatment. The part of this figure indicated in the red square 3 was showed again in main Figure 4A, which presented the experimental condition used in the Figure 4B and 4C.
