# Supplementary material
Source: PubMed Central journal article supplement (PMC7115834)
Supplement: EMS86629-supplement-Supplementary_Material_3.pdf [file EMS86629-supplement-Supplementary_Material_3.pdf]

## Supplemental Material

### Functional screening of candidate causal genes for insulin resistance in human preadipocytes and adipocytes

Zhifen Chen, PhD <sup>1,2</sup>, Haojie Yu, PhD <sup>1,2</sup>, Xu Shi, PhD <sup>1</sup>, Curtis R. Warren, PhD <sup>3</sup>, Luca A. Lotta, MD, PhD <sup>4</sup>, Max Friesen, PhD <sup>1,2</sup>, Torsten B. Meissner, PhD <sup>1,2</sup>,

Claudia Langenberg, MD, PhD<sup>4</sup>, Martin Wabitsch, MD, PhD <sup>5</sup>, Nick Wareham, MD, PhD <sup>3</sup>, Mark D. Benson, MD <sup>1</sup>, Rob E. Gerszten, MD <sup>1</sup>, Chad A. Cowan, PhD <sup>1,2,\*</sup>

<sup>1</sup> Cardiovascular institute, Beth Israel Deaconess Medical Center, Harvard Medical School, Boston, MA 02115, USA; <sup>2</sup> Harvard Stem Cell Institute, Harvard University, Cambridge, MA 02138, USA; <sup>3</sup> Cardiometabolic Disease Research, Boehringer-Ingelheim Pharmaceuticals Inc., Ridgefield, CT 06877, USA; <sup>4</sup> MRC Epidemiology Unit, University of Cambridge School of Clinical Medicine, Cambridge CB2 0SL, UK; <sup>5</sup> Department of Paediatrics and Adolescent Medicine, Ulm University Hospital, Ulm 89075, Germany.

#### \* Address for Correspondence:

Chad A. Cowan, PhD  
Assistant Professor  
Division of Cardiology  
Beth Israel Deaconess Medical Center  
CLS 917D, 3 Blackfan Circle, Boston MA 02115  
Email: [ccowan@bidmc.harvard.edu](mailto:ccowan@bidmc.harvard.edu)

#### This file includes:

Online Supplemental Methods  
References  
Online Figure I to VII  
Online Table I to VII

## **Online Supplemental Methods**

### **SGBS cell culture, adipogenic differentiation and cell treatment**

SGBS preadipocytes were obtained as a gift from Dr. Martin Wabitsch's lab, and grown in OF medium (DMEMF12 supplemented with 10% FBS, 33um biotin, 17um panthotenat and 1% Penicillin/Streptomycin)<sup>1,2</sup>. The preadipocytes were differentiated into adipocytes using Quick-Diff medium (OF medium supplemented with 0.01mg/ml transferrin, 20 nm insulin, 100nm cortisol, 0.2nm T3, 25nm dexamethasone, 250um IBMX and 2um rosiglitazone) for the first three days, followed by maintenance medium (OF medium with 0.01mg/ml transferrin, 20nm insulin, 100nm cortisol and 0.2nm T3) for 12-20 days. Maintenance medium was exchanged every three days<sup>1,2</sup>.

### **Lentivirus generation and CRISPR/Cas9-based targeting of SGBS preadipocytes**

To construct sgRNA lentiviral plasmids, sgRNAs were designed using the on-line tool at <http://crispr.mit.edu/> and two oligonucleotides, 5'-CACCG-sgRNA sequence-3' and 5'-CAAA-(reverse compliment of sgRNA)-C-3' were synthesized. Oligonucleotides were annealed and ligated into LentiGuidePuro (Addgene #52963) plasmid after BsmBI digestion (Online Table II). Three sgRNAs were designed for each gene and the oligonucleotides were synthesized at Eurofins Scientific. The Cas9 lentiviral plasmid (lentiCas9-Blast) was purchased at Addgene (#52962). Cas9- and sgRNA-encoding lentivirus were packaged with the second-generation lentivirus system. A Cas9-expressing SGBS-preadipocytes cell line (SGBS-Cas9) was generated by transducing the cells with the lentiCas9-Blast lentivirus followed by 5ug/ml of blasticidin selection three days after transduction. Individual IR-genes were targeted by transduction of SGBS-Cas9 preadipocytes with the corresponding three sgRNA lentiviral particles. Three-day post infection, 3ug/ml puromycin was applied for four days to select for sgRNA-expressing cells.

### **Polymerase chain reaction (PCR), reverse transcription PCR, quantitative real-time PCR and next generation sequencing**

Total mRNA was isolated from SGBS pre- and adipocytes using the trizol protocol (Life Technologies) and 1 $\mu$ g was used for reverse transcription of cDNA using the Maxima<sup>Th</sup> H Minus cDNA Synthesis Master Mix (Thermo Scientific, #FERM1662). Gene expression was quantified by qRT-PCR using 1 $\mu$ l of the reverse transcription reaction and the Fast SYBR<sup>TM</sup> Green Master Mix (Thermo Scientific, #4385614). Primer sequences are provided in Online Table III. Genomic DNA of each knockout SGBS line was isolated by DNeasy Blood & Tissue Kit (QIAGEN, #69506). The genomic region of the targeted sites was amplified by PCR of isolated genomic DNA. Amplicons were 200-280 base pairs in length including the target-specific PCR primers (Online Table IV). The sites of interest (i.e. CRISPR cut site) are located within the first 100 base pairs from either the 5'-end or the 3'-end of the amplicon. The CRISPR/Cas9 targeting efficiency was calculated, using the results from pooled next generation sequencing (NGS) of the target-specific amplicons. For the pooled NGS, amplicons from each knockout cell line were barcoded prior to pooling.

### **Immunofluorescence and high content imaging**

For immunofluorescence analyses, SGBS adipocytes were fixed with ice-cold methanol at -20°C for 15 min, and immunolabeled using the primary antibody for cEBP $\alpha$  (1:200, Abcam, #ab40761). Donkey anti-Rabbit Alexa Fluor 488 (1:1000, Life Technologies, #A10040) was used as the secondary antibody. LipidTox Red (1:1000, Life Technologies, #H34476) was used as the secondary antibody. LipidTox Red (1:1000, Life Technologies, #H34476) was applied to stain the lipid droplets. Nuclear DNA was stained by DAPI (1:500, Life Technologies, #62248). The secondary antibody only control was employed to validate its specificity and eliminate the background signal. Images were captured using a high content imaging system (Thermo Fisher Arrayscan XTi). The ratio of cEBP $\alpha$ /DAPI was quantified using an ArrayScan high-content analysis software (ThermoFisher scientific).

### **Lipid extraction and triglycerides measurement**

SGBS adipocytes were washed twice with PBS and detached by scraping. A chloroform:methanol (2:1; v/v) mixture was used to extract lipid from the adipocytes, and evaporated to dry overnight in a fume hood. The dried lipid was suspended in 100  $\mu$ L of 1%

TritonX100 in absolute ethanol for 1 hour with constant rotation. This was then dried in a speedvac for 30 minutes and suspended in 100  $\mu$ L PBS with 1% Triton. 3  $\mu$ L of the suspension was used to measure the lipid levels. Triglyceride was quantified using Infinity Triglycerides Solution (VWR, #46100-346).

### **Lipolysis**

To assist the induction of lipolysis, SGBS adipocytes were starved in serum-free DMEM (with 0.2% BSA) overnight to clear residual insulin and lipid in the differentiation medium. Lipolysis was induced by KRPH buffer (Life Technologies) supplemented with 10  $\mu$ M forskolin for 4 hours. Glycerol accumulated in the KRPH buffer was measured using the Free Glycerol Reagent (Sigma, #F6428).

### **Western blot**

Adipocytes were harvested in Cell Lysis Buffer (Cell Signaling, #9803) supplemented with Halt™ Protease and Phosphatase Inhibitor Cocktail (Thermo, #78440). The cell lysates of SGBS adipocytes were subjected to gel electrophoresis under heat denaturing conditions, using NuPAGE® Novex® 4-12% Bis-Tris Protein Gels (Life Technologies, #NP0323BOX) Primary antibodies for FST (Abcam, #ab157471), PEPD (Thermo, #OT11B7), PDGFC (Abcam, #ab93899), MAP3K1 (Abcam, #ab212601), PPARG (Cell Signaling, #2443), ARL15 (Abcam, #ab178425) and HSP 90 (Santa Cruz Biotechnology, # sc-13119) were used to detect the protein expression in SCR and KO-adipocytes. Primary antibodies for phospho-AKT2 (Ser474), total AKT2 and  $\beta$ -actin were purchased from Cell Signaling (#8599 and #5239) and Sigma-Aldrich (#A5316), respectively. Anti-rabbit or mouse IgG, HRP-linked Antibody (1: 2000, R&D system, #HAF008 and #HAF018) was used as secondary antibodies for the corresponding species. The ratio of phospho-AKT2 (Ser474) to total AKT was quantified by analyzing the western blots using the NIH ImageJ software and data was normalized to  $\beta$ -actin level. All experiments were performed at least three times and the representative results were presented.

### **Phospho-AKT2 (Ser474) ELISA**

Adipocyte lysate was harvested as above and used for measurement of p-AKT2 (Ser474) and total protein. Phosphorylation of AKT2 (Ser474) was measured by Pathscan® phospho-akt2 (ser474) sandwich ELISA kit (Cell Signaling, #7048) according to the manufacturer's protocol.

#### **LC-MS/MS-based 2-DeoxyGlucose-6-Phosphate detection**

To measure the insulin induction of glucose uptake in SGBS adipocytes, cells were starved for 24 hours in glucose- and insulin-free 3FC medium to clear residual insulin and glucose. After starvation, cells were treated with 200  $\mu$ M 2-DG with or without insulin (10nM) for 30 minutes. To extract metabolites from the treated adipocytes for 2-DG-phosphate (2-DG-6P) quantification, the cells were lysed by adding precooled 80% methanol in -80 °C for 15 minutes. Cells were then scraped off the plates and thoroughly lysed by vortexing and trituration. We excluded the cell debris from the lysate by centrifugation and the supernatant was dried by a speedVac. For the detection of 2-DG-6P, dried samples were suspended with 60  $\mu$ l of acetonitrile / methanol (75:25; v:v) containing 25  $\mu$ M of deuterated phenylalanine-d8 (Phe-d8, Cambridge Isotope Laboratories) as the internal standard. The suspension was transferred into the 250  $\mu$ l insert vial (Microsolv Technology) and 20  $\mu$ l of the sample was loaded onto the HILIC column (Atlantis HILIC 100A, 3 $\mu$ m, 2.1mm X 150mm, Waters) using the HTS PAL auto-sampler (LEAP Technologies). Phe-d8 and 2-DG-6P were detected by the HPLC-coupled 4000 Q-TRAP mass spectrometry in MRM-based assay in negative mode. The MRM transition of Phe-d8 was 172.2 to 154 with the DP=-50 V, CE=-20V, CXP=-15V, and EP=-10V. Two different MRM transitions of 2DG-6P were applied, firstly, 243 to 78.9 with the DP=-70V, CE=-60V, CXP=-5V and EP=-10V, and secondly 243 to 96.8 with the DP=-70V, CE=-30V, CXP=-5V and EP=-10V. The source parameters were as follows: curtain gas (20psi), collision gas (4psi), ionspray voltage (-4500V), temperature (450°C), ion source gas 1 and 2 (40psi and 50psi, respectively) and the interface heater on. The detected peaks of compounds were integrated using MultiQuant 3.0.3 software (ABSciex) for the quantification.

#### **Sanger sequencing based-off-target analysis**

Potential off-target sites were predicted for the sgRNAs targeting *FST*, *PEPD*, and *PDGFC* using the publically accessible web tool, CCTop (Online Table V) <sup>3</sup>. The predicted off-target sites with less than four base-pair mismatches were amplified for off-target analysis. Forward and reverse primers were designed ~150 base pairs upstream and downstream to the predicted site. These loci were amplified from the genomic DNA of SCR and KO-adipocytes and genotyped by Sanger sequencing (Online Table VI). Genome editing events were evaluated by the comparison between the sequence of the predicted site in SCR and KO adipocytes (Online Figure VI).

### **MRNA transfection**

We used the mRNA Synthesis Kit (System Biosciences, # MR-KIT-1) to construct the transcription template plasmids encoding *FST*, *PEPD* and *PDGFC*. We produced the corresponding transcripts using *in vitro* transcription following the manufacturer's manual. Briefly, open reading frames (ORF) of *FST*, *PEPD* and *PDGFC* were amplified from Dharmacon plasmids, # MHS6278-202829884, # OHS6085-213573836 and # MHS1010-202700476 respectively. Restriction enzyme sites (EcoRI at the 5' end and BamHI at the 3' end) were appended using PCR (Online Table VII). The three ORFs were cloned individually into the multiple cloning site (MCS) of pMRNAXP mRNA Synthesis Vector (System Biosciences, # MR000PA-1). The ORFs were cloned into the expression vector using T4 DNA Ligase (NEB, # M0202S). The expression vectors were used as templates for *in vitro* transcription of the mRNA by T7 RNA Polymerase Mix in the mRNA synthesis kit, following the manufacturer's protocols. The *FST*, *PEPD* and *PDGFC* transcripts were delivered into preadipocytes and adipocytes (0.5ug per well of a 24-well plate) by RNAfection (System Biosciences, # MR750A-1).

### **Reference**

1. Wabitsch M, Brenner RE, Melzner I, Braun M, Möller P, Heinze E, Debatin KM, Hauner H. Characterization of a human preadipocyte cell strain with high capacity for adipose differentiation. *Int J Obes*. 2001;25:8–15.

2. Fischer-Posovszky P, Newell FS, Wabitsch M, Tornqvist HE. Human SGBS cells - A unique tool for studies of human fat cell biology. *Obes. Facts.* 2008;1:184–189.
3. Stemmer M, Thumberger T, Del Sol Keyer M, Wittbrodt J, Mateo JL. CCTop: An intuitive, flexible and reliable CRISPR/Cas9 target prediction tool. *PLoS One.* 2015;10.

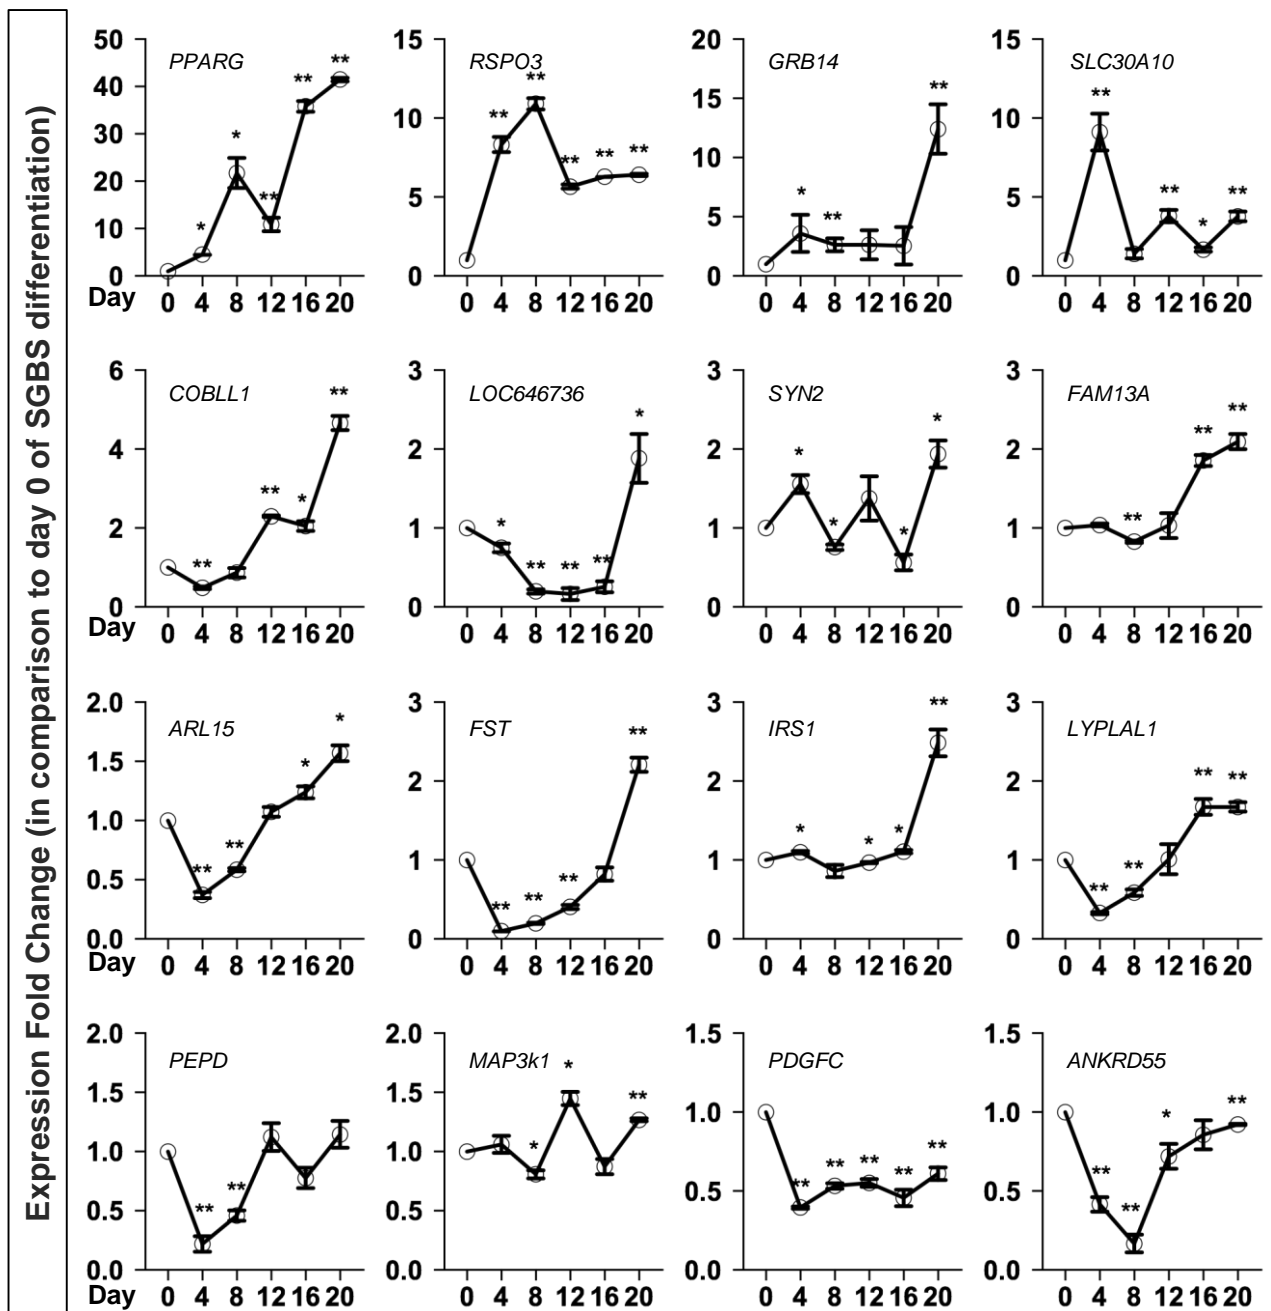

**Online Figure I. Evaluation of the IR-gene expression patterns during SGBS preadipocyte differentiation.** RT-qPCR was used to analyze mRNA levels at differentiation day 0, 4, 8, 12, 16 and 20. Results were normalized to *RPLP0* mRNA, expression fold change was compared to day 0 and data are presented as line chart, mean  $\pm$  SD,  $n=3$  (\*,  $p < 0.05$ ; \*\*,  $p < 0.01$ ).



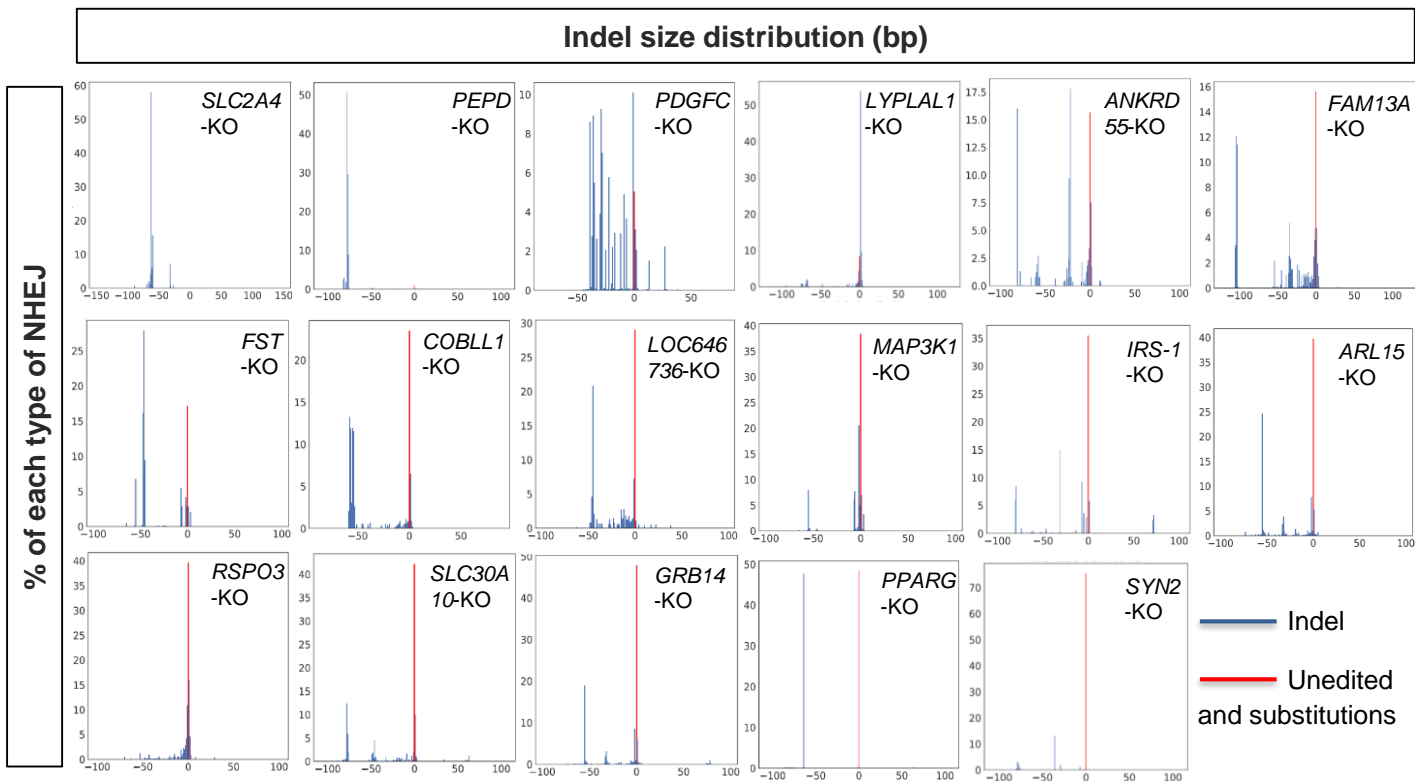

**Online Figure II. Knockout efficiency quantified by next generation sequencing (NGS) of the target sites in KO SGBS lines.** The square chart for corresponding KO SGBS line displays percentage and size distribution of non-homologous end joining (NHEJ) generated by the three sgRNA targeting system, the size distribution indicated on the x-axis (minus as deletion, plus as insertion and zero as unedited or substitution). Indels are shown in blue and unedited sites or substitutions are shown in red. The total percentage of the three types of NHEJ including insertions, deletions and substitutions is presented in main Figure 1B. Total sequence reads per sample =150,000 – 300,000.

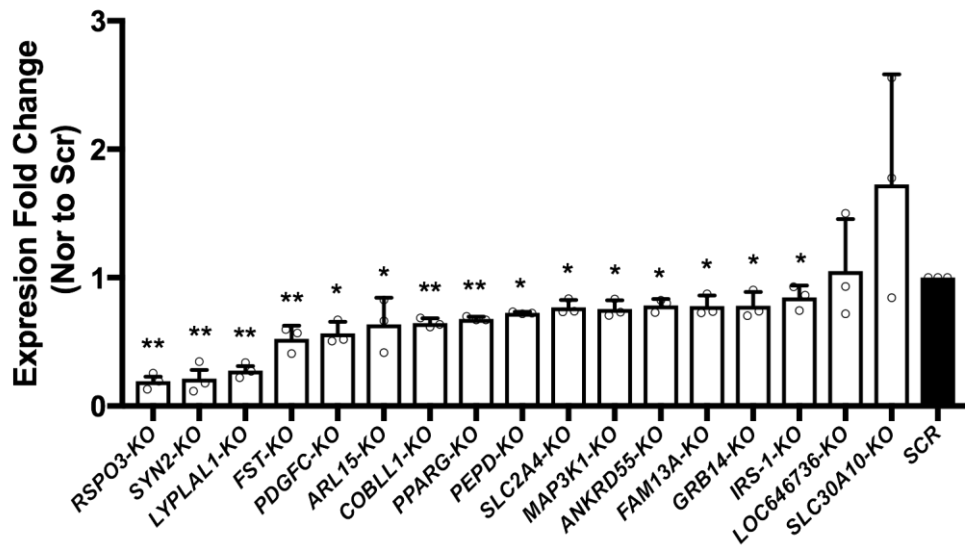

**Online Figure III. Evaluation of gene knockout efficiency at the mRNA level.** RT-qPCR was used to analyze mRNA levels of each gene in corresponding KO-adipocytes. Results were normalized to *RPLP0* mRNA. Expression fold change was compared to the gene level in SCR adipocytes and data are presented as bar graph, mean  $\pm$  SD, n=3 (\*,  $p < 0.05$ ; \*\*,  $p < 0.01$ ).

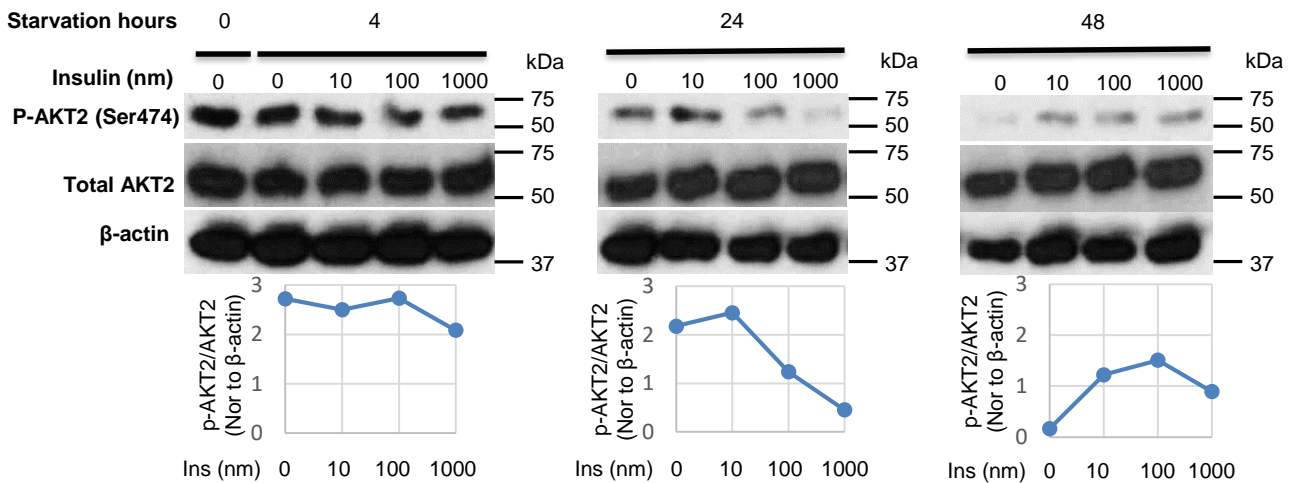

**Online Figure IV. Optimization of the condition for insulin treatment.** For this purpose, we used the level of AKT2 (Ser474) phosphorylation (p-AKT2) as an indicator. To minimize the basal pAKT2 level, 0, 4, 24 and 48 hours of starvation time were tested. For each starvation time point, we evaluated the levels of phosphor-AKT2 (Ser474), total AKT2 and  $\beta$ -actin of SGBS preadipocyte after the treatment of 0, 10, 100 and 1000nm insulin (Ins). The line charts display the ratio of phospho-AKT2 (Ser474) to total AKT2 and the ratio was normalized to the  $\beta$ -actin level of the same sample.

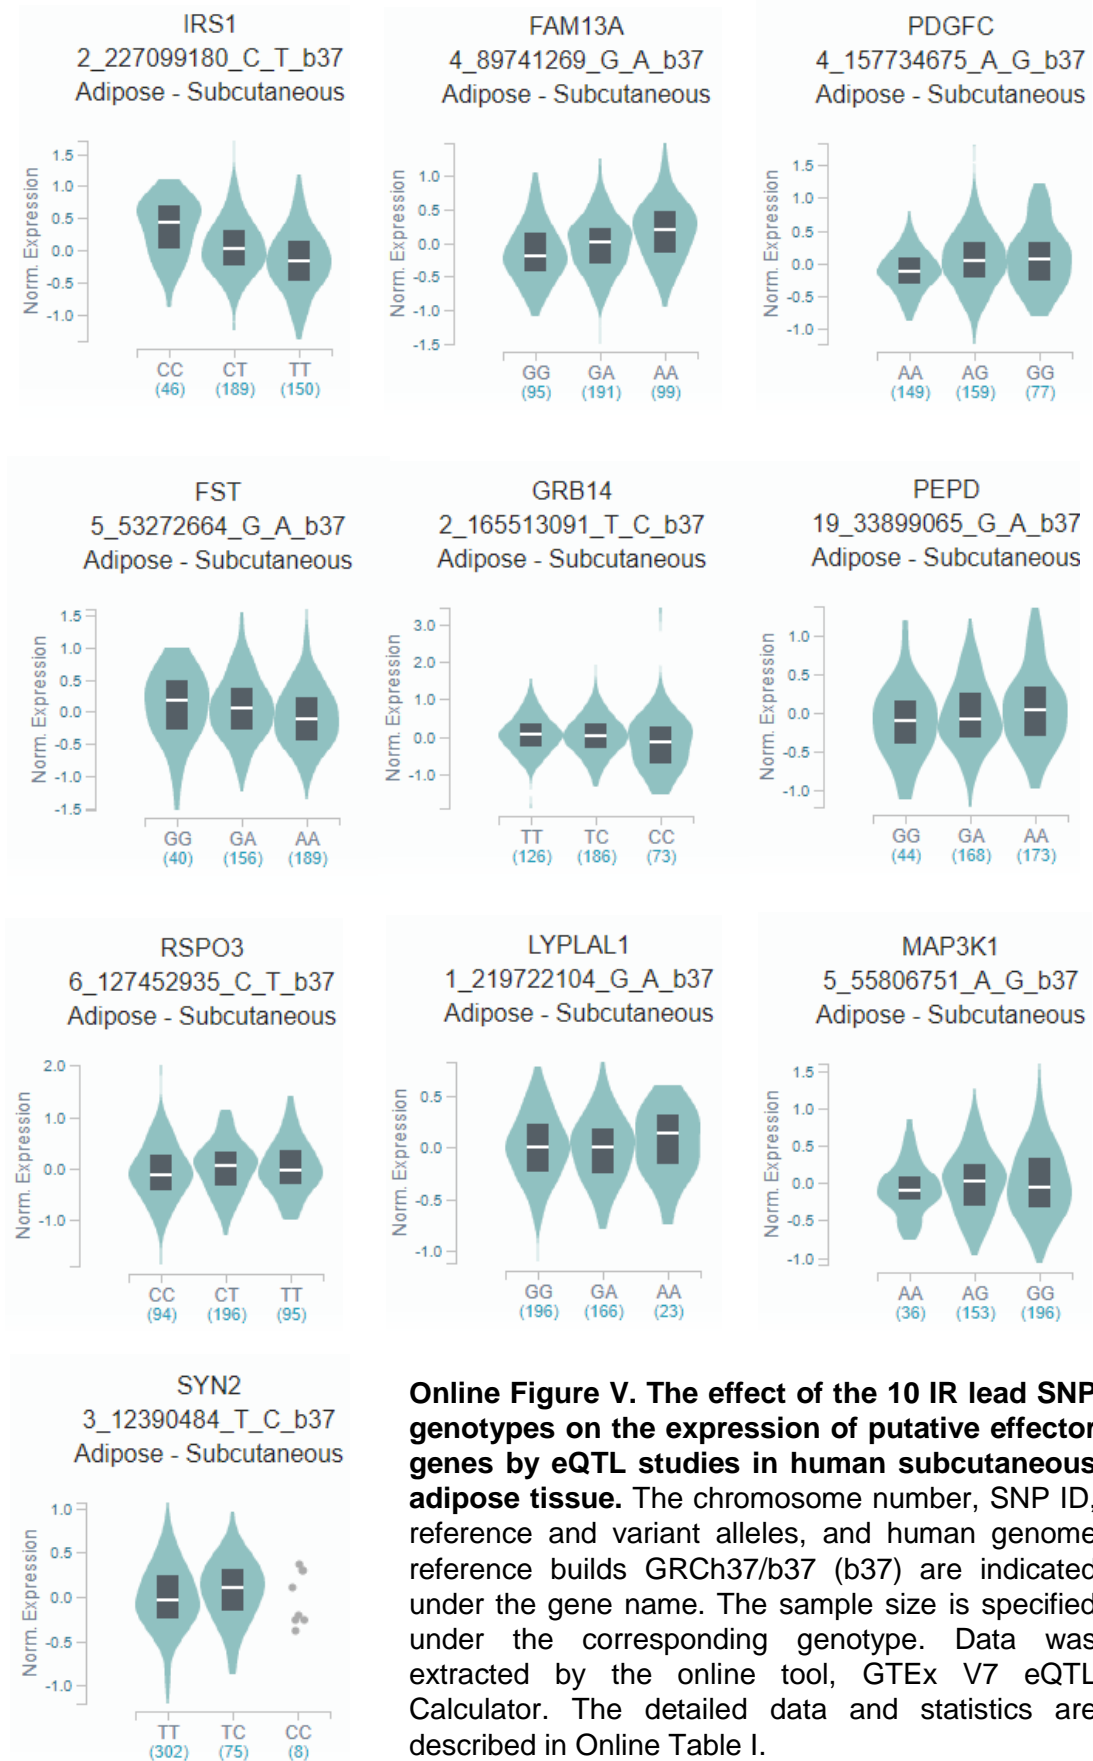

**Online Figure V. The effect of the 10 IR lead SNP genotypes on the expression of putative effector genes by eQTL studies in human subcutaneous adipose tissue.** The chromosome number, SNP ID, reference and variant alleles, and human genome reference builds GRCh37/b37 (b37) are indicated under the gene name. The sample size is specified under the corresponding genotype. Data was extracted by the online tool, GTEx V7 eQTL Calculator. The detailed data and statistics are described in Online Table I.

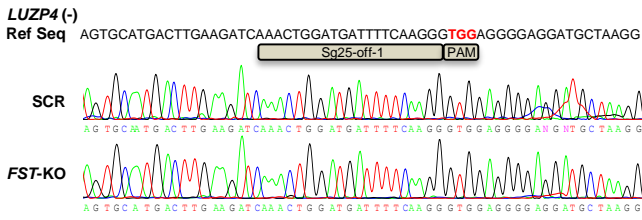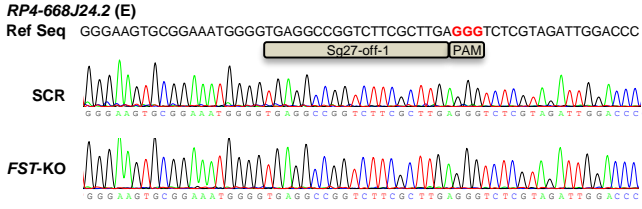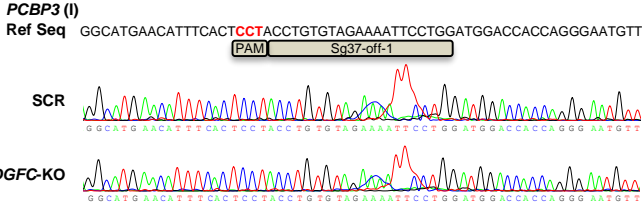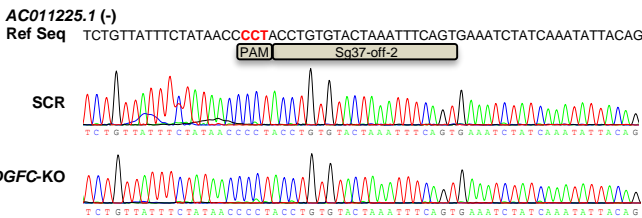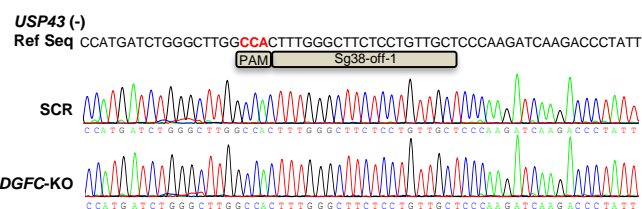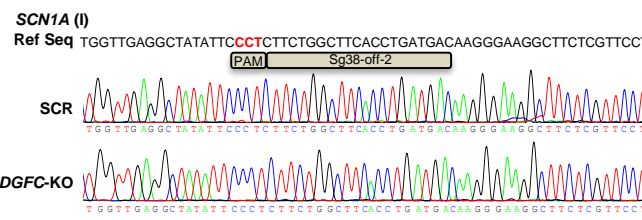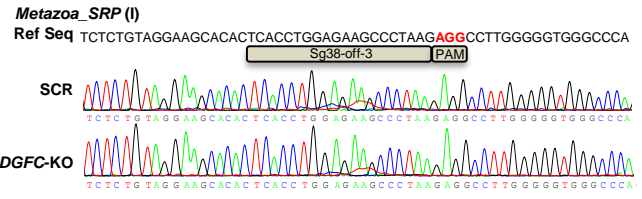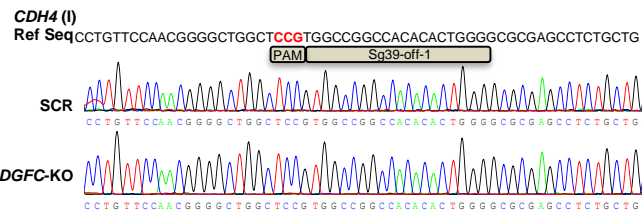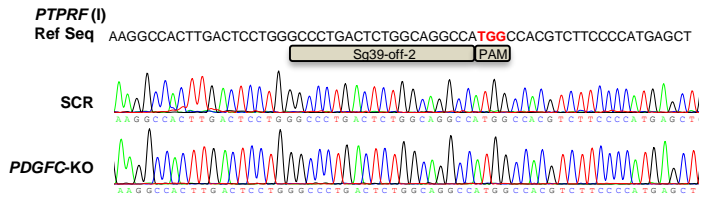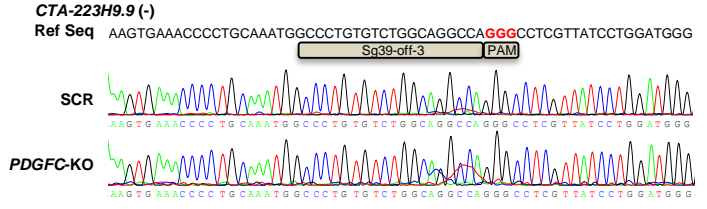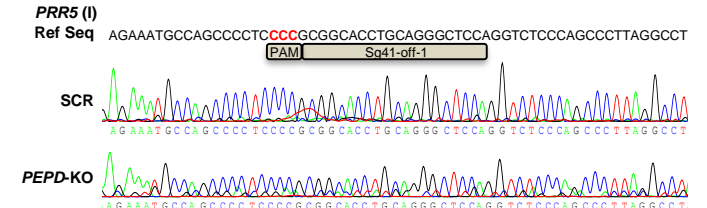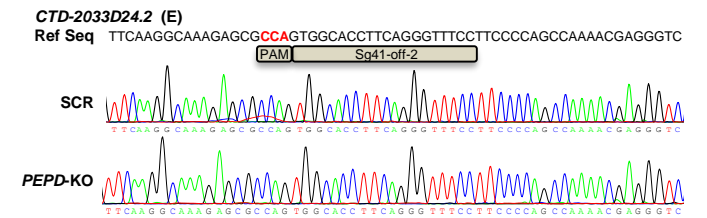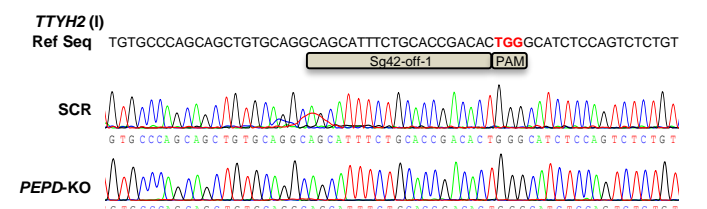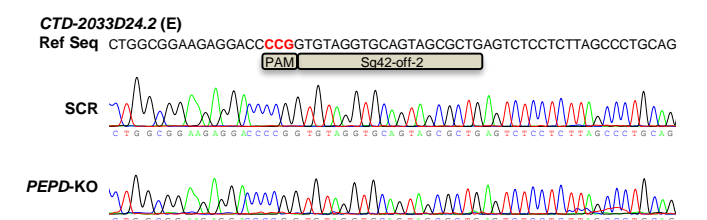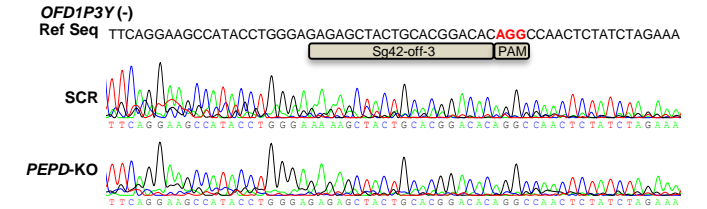

**Online Figure VI. Sequencing chromatograms of predicted off-targets sites in SCR and SGBS-KO adipocytes.** The reference sequence (Ref Seq, 5'-3') was extracted from hg38. Predicted off-target site position is indicated with gene name (E = exonic; I = intronic; - = intergenic). Predicted off-target site for corresponding sgRNA shown in the grey box under the Ref Seq.

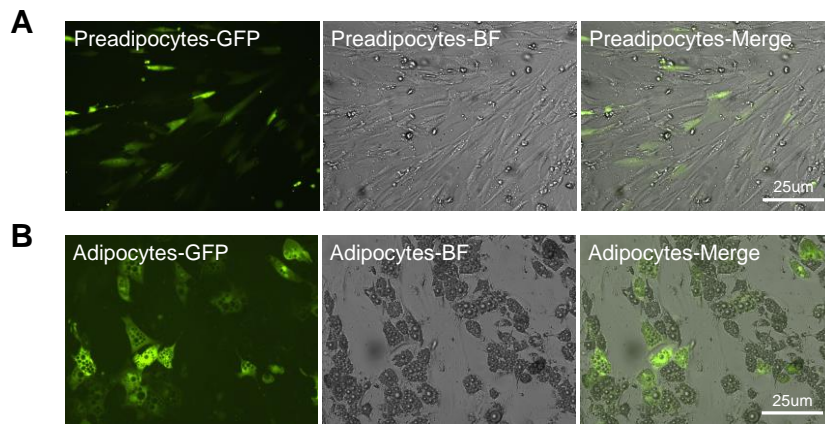

**Online Figure VII. GFP transcript expression in preadipocytes and adipocytes.** Representative bright field (BF) and fluorescence images of GFP-expressing preadipocytes and adipocytes.

| 10 IR loci |                                                     | eQTL analysis of IR risk alleles (RA) |                                                       |                                          |                                             |                        |  |
|------------|-----------------------------------------------------|---------------------------------------|-------------------------------------------------------|------------------------------------------|---------------------------------------------|------------------------|--|
| Transcript | Lead SNP_ref var                                    | P var                                 | NES_var                                               | SNP_IR_RA                                | Action of IR risk allele on gene expression | Tissue                 |  |
| IRS1       | rs2943645_C_T                                       | 1.70E-10                              | -0.280                                                | rs2943645_T                              | Downregulation                              | Adipose - Subcutaneous |  |
| FAM13A     | rs3822072_G_A                                       | 1.30E-07                              | 0.200                                                 | rs3822072_A                              | Upregulation                                | Adipose - Subcutaneous |  |
| PDGFC      | rs6822892_A_G                                       | 3.10E-05                              | 0.160                                                 | rs6822892_A                              | Downregulation                              | Adipose - Subcutaneous |  |
| FST        | rs4865796_G_A                                       | 1.00E-02                              | -0.120                                                | rs4865796_A                              | Downregulation                              | Adipose - Subcutaneous |  |
| GRB14      | rs10195252_T_C                                      | 1.20E-02                              | -0.140                                                | rs10195252_T                             | Upregulation                                | Adipose - Subcutaneous |  |
| PEPD       | rs731839_G_A                                        | 1.60E-02                              | 0.110                                                 | rs731839_G                               | Downregulation                              | Adipose - Subcutaneous |  |
| RSPO3      | rs2745353_C_T                                       | 2.40E-01                              | 0.055                                                 | rs2745353_T                              | Upregulation                                | Adipose - Subcutaneous |  |
| LYPLAL1    | rs4846565_G_A                                       | 8.40E-01                              | -0.007                                                | rs4846565_G                              | Downregulation                              | Adipose - Subcutaneous |  |
| MAP3K1     | rs459193_A_G                                        | 6.90E-01                              | 0.017                                                 | rs459193_G                               | Upregulation                                | Adipose - Subcutaneous |  |
| SYN2       | rs17036328_T_C                                      | 2.00E-01                              | 0.064                                                 | rs17036328_T                             | Downregulation                              | Adipose - Subcutaneous |  |
| 10 IR loci | Fladj BMI_MAGIC_GLYCEMIC_European GWAS <sup>4</sup> | P IR_RA                               | T2Dadj BMI_DIAMANTE (European) T2D GWAS <sup>33</sup> | CVD_CARDIOGRAMplusC4D GWAS <sup>51</sup> |                                             |                        |  |
| Locus      | Lead SNP_ref var                                    | Effect size_IR_RA                     | OR var                                                | OR var                                   | P_var                                       | P_var                  |  |
| IRS1       | rs2943645_C_T                                       | 0.019                                 | 1.110                                                 | 1.110                                    | 1.60E-39                                    | 6.48E-04               |  |
| FAM13A     | rs3822072_G_A                                       | 0.012                                 | 1.80E-08                                              | 1.040                                    | 2.30E-07                                    | 4.20E-02               |  |
| PDGFC      | rs6822892_A_G                                       | 0.014                                 | 2.60E-10                                              | 0.958                                    | 7.10E-08                                    | 3.53E-01               |  |
| FST        | rs4865796_G_A                                       | 0.015                                 | 2.20E-12                                              | 1.060                                    | 6.70E-14                                    | 2.63E-01               |  |
| GRB14      | rs10195252_T_C                                      | 0.017                                 | 1.30E-16                                              | 0.923                                    | 5.70E-26                                    | 2.00E-02               |  |
| PEPD       | rs731839_G_A                                        | 0.015                                 | 5.10E-12                                              | 0.957                                    | 7.42E-13                                    | 4.33E-03               |  |
| RSPO3      | rs2745353_C_T                                       | 0.014                                 | 4.10E-07                                              | 0.980                                    | 7.50E-03                                    | 1.80E-01               |  |
| LYPLAL1    | rs4846565_G_A                                       | 0.013                                 | 1.80E-09                                              | 0.950                                    | 1.40E-10                                    | 3.98E-01               |  |
| MAP3K1     | rs459193_A_G                                        | 0.015                                 | 1.12E-10                                              | 1.080                                    | 1.10E-20                                    | 9.43E-03               |  |
| SYN2       | rs17036328_T_C                                      | 0.021                                 | 3.60E-12                                              | 0.896                                    | 9.80E-23                                    | 3.16E-01               |  |

Ref, reference allele; var, variant allele; NES, normalized effect size; IR, insulin resistance; RA, risk allele; FI, fasting insulin; T2D, type 2 diabetes; CVD, cardiovascular disease; adj BMI, adjusted to BMI; OR, odds ratio.

**Online Table I: eQTL genes and GWAS of the 10 IR-SNPs.**

| Target gene           | sgRNA sequence       | Primer Forward (5'-3')     | Primer reverse (5'-3')          |
|-----------------------|----------------------|----------------------------|---------------------------------|
| <i>PPARG</i> sg1      | CCATTCTGGCCCACCAACTT | CACCGCCATTCTGGCCCACCAACTT  | AAACAAGTTGGTGGGCCAGAATGGC       |
| <i>PPARG</i> sg2      | CTCCGTGGATCTCTCCGTAA | CACCGCTCCGTGGATCTCTCCGTAA  | AAACTTACGGAGAGATCCACGGAGC       |
| <i>PPARG</i> sg3      | AATGGAATGTCTTCGTAATG | CACCGAATGGAATGTCTTCGTAATG  | AAACCATTACGAAGACATTCCATC        |
| <i>IRS1</i> sg4       | ACGCTTCTTCGACTGCGCG  | CACCGACGCTTCTTCGACTGCGCG   | AAACCCG GCA GTA CGA AGA AGC GTC |
| <i>IRS1</i> sg5       | GCGAGCCCTCCGGAGAGCGA | CACCGGCGAGCCCTCCGGAGAGCGA  | AAACTCG CTC TCC GGA GGG CTC GCC |
| <i>IRS1</i> sg6       | TCGTAGTACTCGAGGCGCGC | CACCGTCGTAGTACTCGAGGCGCGC  | AAACGCG CGC CTC GAG TAC TAC GAC |
| <i>GRB14</i> sg7      | AGCCGCGGGTCCCGTCCGGA | CACCGAGCCGCGGGTCCCGTCCGGA  | AAACTCC GGA CGG GAC CCG CGG CTC |
| <i>GRB14</i> sg8      | ATGGGCAGAGCGCCGCGAGC | CACCGATGGGCAGAGCGCCGCGAGC  | AAACGCT CGC GGC GCT CTG CCC ATC |
| <i>GRB14</i> sg9      | GAGGGGCGACGCCACGACC  | CACCGGAGGGGCGACGCCACGACC   | AAACGGT CGT GGG CGT CGC CCC TCC |
| <i>GLUT4</i> sg10     | CCCCTCAGCAGCGAGTGACT | CACCGCCCTCAGCAGCGAGTGACT   | AAACAGT CAC TCG CTG CTG AGG GGC |
| <i>GLUT4</i> sg11     | CTGCAGTTTGGGTACAACAT | CACCGCTGCAGTTTGGGTACAACAT  | AAACATG TTG TAC CCA AAC TGC AGC |
| <i>GLUT4</i> sg12     | GAGCTACAATGAGACGTGGC | CACCGGAGCTACAATGAGACGTGGC  | AAACGCC ACG TCT CAT TGT AGC TCC |
| <i>COBL1</i> sg13     | GAACTCTCAGTGGTCTTACC | CACCGGAATCTCAGTGGTCTTACC   | AAACGGT AGG ACC AAT GAG AGT TCC |
| <i>COBL1</i> sg14     | TCAGTATTTGGTCTCAGC   | CACCGTCAAGTATTTGGTCTCAGC   | AAACGCT GAG ACC AAA TAT ACT GAC |
| <i>COBL1</i> sg15     | AGAATCCACTGCTTTCATCA | CACCGAGAATCCACTGCTTTCATCA  | AAACTGA TGA AAG CAG TGG ATT CTC |
| <i>ANKRD55</i> sg16   | TGGCCAGGCATAAACTTGTG | CACCGTGGCCAGGCATAAACTTGTG  | AAACCAC AAG TTT ATG CCT GGC CAC |
| <i>ANKRD55</i> sg17   | CCCTTGATGCATGCGGTTTC | CACCGCCCTTGATGCATGCGGTTTC  | AAACGAA ACC GCA TGC ATC AAG GGC |
| <i>ANKRD55</i> sg18   | GGGAGCCAATATTAACATGC | CACCGGGGAGCCAATATTAACATGC  | AAACGCA TGT TAA TAT TGG CTC CCC |
| <i>ARL15</i> sg19     | GCAGAGTTTGACAACAGAC  | CACCGGCAGAGTTTGACAACAGAC   | AAACGTC TGT TGT CCA AAC TCT GCC |
| <i>ARL15</i> sg20     | TGTGGTGCACACGACGTTAT | CACCGTGTGGTGCACACGACGTTAT  | AAACATA ACG TCG TGT CGA CCA CAC |
| <i>ARL15</i> sg21     | AGGTCAATTTCTGGTCTGTC | CACCGAGTCAATTTCTGGTCTGTC   | AAACGCA CGA CCA GAA TAT GAC CTC |
| <i>FAM13A</i> sg22    | CTTCGACTGAAGTTCGAGAG | CACCGCTTCGACTGAAGTTCGAGAG  | AAACCTC TCG AAC TTC AGT CGA AGC |
| <i>FAM13A</i> sg23    | GAATCGAGGCTGCAACGCTG | CACCGAATCGAGGCTGCAACGCTG   | AAACCAG CGT TGC AGC CTC GAT TCC |
| <i>FAM13A</i> sg24    | TAGGTGAATGGTAACTGTA  | CACCGTAGGGTGAATGGTAACTGTA  | AAACTCA CGT TAC CAT TCA CCC TAC |
| <i>FST</i> sg25       | AAGTGGATGATTTTCAACGG | CACCGAAGTGGATGATTTTCAACGG  | AAACCCG TTG AAA ATC ATC CAC TTC |
| <i>FST</i> sg26       | GAGCACCTCGTGACCGAGG  | CACCGGAGCACCTCGTGACCGAGG   | AAACCCT CGG TCC ACG AGG TGC TCC |
| <i>FST</i> sg27       | AGCGGCCGTTCTTCGTTGA  | CACCGAGCGGCCGTTCTTCGTTGA   | AAACTCA AGC GAA GAA CGG CCG CTC |
| <i>LOC646736</i> sg28 | CTCACATGGTTCCGGGATAT | CACCGCTCACATGGTTCCGGGATAT  | AAACATA TCC CGG AAC CAT GTG AGC |
| <i>LOC646736</i> sg29 | ATCTTATTTTACGCTGGGG  | CACCGATCTTATTTTACGCTGGGG   | AAACCCC CAG CGT AAA AAT AAG ATC |
| <i>LOC646736</i> sg30 | CCAAAGAAGAAGATACCTCC | CACCGCAAAGAAGAAGATACCTCC   | AAACGGA GGT ATC TTC TTC TTT GGC |
| <i>LYPLAL1</i> sg31   | AAAGTGGCATCAAGAAGAAC | CACCGAAAGTGGCATCAAGAAGAAC  | AAACGTT CTT CTT GAT GCC ACT TTC |
| <i>LYPLAL1</i> sg32   | AAATCTGTCAAACCATACAT | CACCGAAATCTGTCAAACCATACAT  | AAACATG TAT GGT TTG ACA GAT TTC |
| <i>LYPLAL1</i> sg33   | ACATGACATCAATTGATTCA | CACCGACATGACATCAATTGATTCA  | AAACTGA ATC AAT TGA TGT CAT GTC |
| <i>MAP3K1</i> sg34    | GGGGAATCGCGCCTCGTCGT | CACCGGGGAATCGCGCCTCGTCGT   | AAACACG ACG AGG CGC GAT TCC CCC |
| <i>MAP3K1</i> sg35    | GCCGCCAGTCCGCCGCTCG  | CACCGGCCAGTCCGCCGCTCG      | AAACCGA GCG GGC GGA CTG GCG GCC |
| <i>MAP3K1</i> sg36    | CAAGGCGAGCAGCGCGCCG  | CACCGCAAGGCGAGCAGCGCGCCG   | AAACCGG GCG CGC TGC TCG CCT TGC |
| <i>PDGFC</i> sg37     | CTGGAATTTACTACTCAGGT | CACCGCTGGAATTTACTACTCAGGT  | AAACACC TGA GTA GTA AAT TCC AGC |
| <i>PDGFC</i> sg38     | TCAGCAGGAGAAGCCCGAAG | CACCGTCAGCAGGAGAAGCCCGAAG  | AAACCTT CGG GCT TCT CCT GCT GAC |
| <i>PDGFC</i> sg39     | CCCCTGTCTCTGGCCGGCCA | CACCGCCCTGTCTCTGGCCGGCCA   | AAACTGG CCG GCC AGA GAC AGG GGC |
| <i>PEPD</i> sg40      | TGTGCAGGCCGGCTCCATCG | CACCGTGTGCAGGCCGGCTCCATCG  | AAACCGA TGG AGC CGG CCT GCA CAC |
| <i>PEPD</i> sg41      | TGAAACCCTGAAGGTGCCGC | CACCGTGAACCCTGAAGGTGCCGC   | AAACGCG GCA CCT TCA GGG TTT CAC |
| <i>PEPD</i> sg42      | CAGCGCTACTGCACCGACAC | CACCGCAGCGCTACTGCACCGACAC  | AAACGTG TCG GTG CAG TAG CGC TGC |
| <i>RSPO3</i> sg43     | TGGCAGCCTTGACTAACGTT | CACCGTGGCAGCCTTGACTAACGTT  | AAACAAC GTT AGT CAA GGC TGC CAC |
| <i>RSPO3</i> sg44     | CGAGTTCCATAATCCACT   | CACCGGAGTTCCATAATCCACT     | AAACAGT GGA TAT TAT GGA ACT CGC |
| <i>RSPO3</i> sg45     | GCCCAGACTATTTTTGCTC  | CACCGGCCAGACTATTTTTGCTC    | AAACGAG CAA AAA ATA GTC TGG GCC |
| <i>SLC30A10</i> sg46  | TGAGCGCCGGCTACATCGCC | CACCGTGAAGCGCCGGCTACATCGCC | AAACGGC GAT GTA GCC GGC GCT CAC |
| <i>SLC30A10</i> sg47  | CTCGGCGCGGGCGTAGCCGT | CACCGCTCGGCGCGGGCGTAGCCGT  | AAACACG GCT ACG CCC GCG CCG AGC |
| <i>SLC30A10</i> sg48  | GCTACTCTGGCAAGACGTGC | CACCGCTACTCTGGCAAGACGTGC   | AAACGCA CGT CTT GCC AGA GTA GCC |
| <i>SYN2</i> sg49      | CGGTGATGTAGCCGTTGGGC | CACCGCGGTGATGTAGCCGTTGGGC  | AAACGCC CAA CGG CTA CAT GAC CGC |
| <i>SYN2</i> sg50      | TGATGAACTTCTGCGGCGC  | CACCGTGAAGTCTCTGCGGCGC     | AAACGCG CCG CAG GAA GTT CAT CAC |
| <i>SYN2</i> sg51      | GCGCCCGCGCCGACGCGCT  | CACCGGCGAGCCCGCGCCGACGCGCT | AAACACG GCG TCG GCG CGG GCT GCC |

Online Table II: SgRNA sequences and primers for sgRNA plasmid cloning.

| Gene             | Primer Forward (5'-3') | Primer reverse(5'-3') |
|------------------|------------------------|-----------------------|
| <i>PPARG</i>     | CGTGGATCTCTCCGTAATGG   | GAGATGCAGGCTCCACTTTG  |
| <i>IRS1</i>      | GATGGCTTCTCGGACGTGCG   | GTTTGGGGGCGCTCGACTTG  |
| <i>GRB14</i>     | CACTTCCCTGCAAGATGGGC   | GATGGCATTTCGGAACATC   |
| <i>GLUT4</i>     | CGGGCTTCCAACAGATAGGC   | GCCACGTCTCATTGTAGCTC  |
| <i>COBLL1</i>    | CCGCAGGACGCCCCAGCCAG   | ACCACTGAGAGTTCAACGTC  |
| <i>ANKRD55</i>   | CAGCACCCCTTCTGTGTTTG   | AGGATAGAAGGGTCTTCCCG  |
| <i>ARL15</i>     | GAGGCGTTTCTGTACATGG    | CGTTATCGGGGCTTTCACTG  |
| <i>FAM13A</i>    | CACCGAGAATGGCATTCCAG   | AGCAGACATCACCGTCCTTC  |
| <i>FST</i>       | TTCATGGAGGACCGCAGTGC   | GTGTGTTGTCATTACGTCC   |
| <i>LOC646736</i> | AATGAACAAGTCCACCCAG    | GGAGGTATCTTCTTCTTTGG  |
| <i>LYPLAL1</i>   | ATTTATCCAACAGCTCCTCC   | CAGTAAGCACTTGACACATG  |
| <i>MAP3K1</i>    | AAGTGCGGAGTGTGGAGCTG   | CTGGAAGCCGGTCCCCTC    |
| <i>PDGFC</i>     | CTTCTCCTGCTGACATCTGC   | CTTGGGCTGTGAATACTTCC  |
| <i>PEPD</i>      | TTGAACCGGCAGCGCCTGTG   | GTGACACCGAACGCCAGTG   |
| <i>RSPO3</i>     | TATGGAATACATCGGCAGCC   | GAGCATGTTGCACAGCCTCC  |
| <i>SLC30A10</i>  | GACTCCTTCAACATGCTCTC   | AGGAAGACCGCGTTGCTCAG  |
| <i>SYN2</i>      | ATGATGAACTTCTGCGGGC    | GGTCGGTCATGTAGCCGTTG  |

Online Table III: Primers for qRT-PCR.

| Gene             | Primer Forward (5'-3')   | Primer reverse (5'-3') |
|------------------|--------------------------|------------------------|
| <i>PPARG</i>     | TTCTCTAGGACTTAACTTCACAGC | TGCAACCACTGGATCTGTTCT  |
| <i>IRS1</i>      | CACCCGGTTGTTTTTCGGAG     | TTGTGCCGCCACTTCTTCTC   |
| <i>GRB14</i>     | ACAATGACCACTTCCCTGCAA    | TCCAGGGTTGCCTACCTGT    |
| <i>GLUT4</i>     | ATGCTGTGTCTTTGTGTCTGC    | ATGGAGCTGGGTCCCTCA     |
| <i>COBLL1</i>    | CAAAAGCCAAGGCACCACTT     | ACCACTGAGAGTTCAACGTC   |
| <i>ANKRD55</i>   | AGGCCAATAAAGCCTGCTCA     | TGTGACAGGCACAAGTCAGT   |
| <i>ARL15</i>     | CACTTTGCTGCAAGGGACCA     | AGGGAGGGGATAAATTGCACA  |
| <i>FAM13A</i>    | CCAGGACTTACCCAAGAAGGT    | GTGCCCAGCCTAGTAAAGTTGT |
| <i>FST</i>       | CCCACCCTTGTCTCTTCACAG    | ACCTTTACAGGGGATGCAGT   |
| <i>LOC646736</i> | TGCAAAACTGGGAGAGCTTCA    | CACTAAGGCTCCACTCACCAT  |
| <i>LYPLAL1</i>   | CATATTCCCTTTTCTTTCT      | TGAACAGTGATAAATTACCA   |
| <i>MAP3K1</i>    | TGTAGCCCGCGAGAGAAAAT     | AGCTCCCACTCCGCACTTT    |
| <i>PDGFC</i>     | CCAGTCAGCCAAATGAGCCT     | ACACACAGCGAGAAACAAGC   |
| <i>PEPD</i>      | CTCTGCAGACCCTCGTTTTG     | ATCACACACCTGCTCACTTG   |
| <i>RSPO3</i>     | TTGTCTCCACAGTGCATCCT     | TCGTGTGGGCACTTACTTGT   |
| <i>SLC30A10</i>  | ACAATCTGGGAGGCGGGTA      | TCCACGAAGATGGTGAAGCA   |
| <i>SYN2</i>      | CCAGCCCTTAAAGCCAGA       | AGCTGAAGAAGCTGCTGCCCA  |

Online Table IV: Primers for PCR of targeted genomic site.



| sg25: AAGTGGATGATTTTCAACGG               |        |    |                      |     |          |                         |  |
|------------------------------------------|--------|----|----------------------|-----|----------|-------------------------|--|
| Coordinates (hg38)                       | strand | MM | target_seq           | PAM | Position | gene name               |  |
| <a href="#">chr5:53483023-53483045</a>   | +      | 0  | AAGTGGATGATTTTCAACGG | GGG | E        | <i>FST</i> (on-target)  |  |
| <a href="#">chrX:115338062-115338084</a> | +      | 2  | AACTGGATGATTTTCAAGGG | TGG | -        | <i>LUZP4</i>            |  |
| sg26: GAGCACCTCGTGGACCGAGG               |        |    |                      |     |          |                         |  |
| Coordinates (hg38)                       | strand | MM | target_seq           | PAM | Position | gene name               |  |
| <a href="#">chr5:53482977-53482999</a>   | +      | 0  | GAGCACCTCGTGGACCGAGG | AGG | E        | <i>FST</i> (on-target)  |  |
| sg27: GCGGCCGTTCTTCGCTTGA                |        |    |                      |     |          |                         |  |
| Coordinates (hg38)                       | strand | MM | target_seq           | PAM | Position | gene name               |  |
| <a href="#">chr5:53482896-53482918</a>   | -      | 0  | AGCGGCCGTTCTTCGCTTGA | CGG | E        | <i>FST</i> (on-target)  |  |
| <a href="#">chr6:1384949-1384971</a>     | +      | 3  | TGAGGCCGGTCTTCGCTTGA | GGG | E        | RP4-668J24.2            |  |
| sg37: CTGGAATTTACTACTCAGGT               |        |    |                      |     |          |                         |  |
| Coordinates (hg38)                       | strand | MM | target_seq           | PAM | Position | gene name               |  |
| <a href="#">chr4:156970811-156970833</a> | +      | 0  | CTGGAATTTACTACTCAGGT | TGG | E        | <i>PDGFC</i> (on-       |  |
| <a href="#">chr21:45784281-45784303</a>  | -      | 3  | CAGGAATTTCTACACAGGT  | AGG | I        | <i>PCBP3</i>            |  |
| <a href="#">chr18:41841371-41841393</a>  | -      | 3  | CTGAAATTTAGTACACAGGT | AGG | -        | <i>AC011225.1</i>       |  |
| sg38: TCAGCAGGAGAAGCCGAAG                |        |    |                      |     |          |                         |  |
| Coordinates (hg38)                       | strand | MM | target_seq           | PAM | Position | gene name               |  |
| <a href="#">chr4:156970876-156970898</a> | +      | 0  | TCAGCAGGAGAAGCCGAAG  | AGG | E        | <i>PDGFC</i> (on-       |  |
| <a href="#">chr17:9735253-9735275</a>    | -      | 3  | GCAACAGGAGAAGCCAAAG  | TGG | -        | <i>USP43</i>            |  |
| <a href="#">chr2:165988057-165988079</a> | -      | 3  | TCATCAGGTGAAGCCAGAAG | AGG | I        | <i>SCN1A</i>            |  |
| <a href="#">chr2:47056412-47056434</a>   | +      | 3  | TCACCTGGAGAAGCCCTAAG | AGG | I        | <i>Metazoa_SRP</i>      |  |
| sg39: CCCCTGTCTCTGGCCGGCCA               |        |    |                      |     |          |                         |  |
| Coordinates (hg38)                       | strand | MM | target_seq           | PAM | Position | gene name               |  |
| <a href="#">chr4:156970847-156970869</a> | +      | 0  | CCCCTGTCTCTGGCCGGCCA | GGG | E        | <i>PDGFC</i> (on-       |  |
| <a href="#">chr20:61504203-61504225</a>  | -      | 3  | CCCCAGTGTGTGGCCGGCC  | CGG | I        | <i>CDH4</i>             |  |
| <a href="#">chr1:43567087-43567109</a>   | +      | 3  | GCCCTGACTCTGGCAGGCCA | TGG | I        | <i>PTPRF</i>            |  |
| <a href="#">chr22:41431849-41431871</a>  | +      | 3  | GCCCTGTGTCTGGCAGGCCA | GGG | -        | <i>CTA-223H9.9</i>      |  |
| sg40: TGTGCAGGCCGGCTCCATCG               |        |    |                      |     |          |                         |  |
| Coordinates (hg38)                       | strand | MM | target_seq           | PAM | Position | gene name               |  |
| <a href="#">chr19:33512655-33512677</a>  | -      | 0  | TGTGCAGGCCGGCTCCATCG | TGG | E        | <i>PEPD</i> (on-target) |  |
| sg41: TGAAACCCTGAAGGTGCCGC               |        |    |                      |     |          |                         |  |
| Coordinates (hg38)                       | strand | MM | target_seq           | PAM | Position | gene name               |  |
| <a href="#">chr19:33512733-33512755</a>  | -      | 0  | TGAAACCCTGAAGGTGCCGC | TGG | E        | <i>PEPD</i> (on-target) |  |
| <a href="#">chr22:44704534-44704556</a>  | -      | 3  | TGGAGCCCTGCAGGTGCCG  | GGG | I        | <i>PRR5</i>             |  |
| <a href="#">chr17:55561520-55561542</a>  | -      | 2  | GGAAACCCTGAAGGTGCCAC | TGG | E        | <i>CTD-2033D24.2</i>    |  |
| sg42: CAGCGCTACTGCACCGACAC               |        |    |                      |     |          |                         |  |
| Coordinates (hg38)                       | strand | MM | target_seq           | PAM | Position | gene name               |  |
| <a href="#">chr19:33512609-33512631</a>  | -      | 0  | CAGCGCTACTGCACCGACAC | CGG | E        | <i>PEPD</i> (on-target) |  |
| <a href="#">chr17:74222922-74222944</a>  | +      | 3  | CAGCATTTCTGCACCGACAC | TGG | I        | <i>TTYH2</i>            |  |
| <a href="#">chr17:55561396-55561418</a>  | -      | 1  | CAGCGCTACTGCACCTACAC | CGG | E        | <i>CTD-2033D24.2</i>    |  |
| <a href="#">chrY:9015703-9015725</a>     | +      | 3  | GAGAGCTACTGCACGGACAC | AGG | -        | <i>OFD1P3Y</i>          |  |

Mismatched(MM) bases less than four were considered as potential off-targets, indicated in red and listed in the table following by the on-target site. Legend for off-target site position: E = exonic; I = intronic; - = intergenic.

Online Table V. Predicted off-target sites of the nine sgRNAs by CCTop.

| Position of the off-site | Name of the off-site | Primer Forward (5'-3') | Primer reverse (5'-3')          |
|--------------------------|----------------------|------------------------|---------------------------------|
| <i>LUZP4</i> (-)         | sg25-off-1           | GGCTTGTGTGGGTGTAGGTT   | GGACAACCGTAAGTTGGGGA            |
| <i>RP4-668J24.2</i> (E)  | sg27-off-1           | CAACTCGCCACCCCTAAACG   | CCAGGTCTGAGGGTGCTTGA            |
| <i>PCBP3</i> (I)         | sg37-off-1           | GTAGCTCTGAATGTGCTGATTC | GAG GTA GGA GGT AGG GGT AG      |
| <i>AC011225.1</i> (-)    | sg37-off-2           | AGCTTCTCCCAGGGTATCAA   | GCT GAA ATT GAG TAC TGT ATG ATG |
| <i>USP43</i> (-)         | sg38-off-1           | TTCTGGAGCACCAAGTCACG   | GCACTTCATGTCTGTACTIONCAAGTT     |
| <i>SCN1A</i> (I)         | sg38-off-2           | AGGCAAAGTCAGTCCATTGT   | CACAGTGAAGTCCAGTGCAGA           |
| <i>Metazoa_SRP</i> (I)   | sg38-off-3           | AGCCATGGTGAATTCTTTTGGG | GCCCACTTTCCATGGGCTA             |
| <i>CDH4</i> (I)          | sg39-off-1           | CACGCCTGTCTTGGGAACAA   | ACCACAATCCGAACATCTGAGT          |
| <i>PTPRF</i> (I)         | sg39-off-2           | TCCCAAAGACCTTCCTCGTGT  | CCAACACCTGGGGACACTCG            |
| <i>CTA-223H9.9</i> (-)   | sg39-off-3           | CCCAAGGTTGGGTGGTCAG    | ACTTCTGGACAGGTTGCAGG            |
| <i>PRR5</i> (I)          | sg41-off-1           | TCTTCTCAGAGTTCAGGGAGGC | CAGTTAAGGGCAGTGAACGGG           |
| <i>CTD-2033D24.2</i> (E) | sg41-off-2           | GTAGCGCTGAGTCTCCTCTT   | CCCTTTCTGAGCTTTAATTTTCTCA       |
| <i>TTYH2</i> (I)         | sg42-off-1           | GGAATCAGATGCCTGGGGTG   | TGGAATTGATTTGTGCTGGAGTC         |
| <i>CTD-2033D24.2</i> (E) | sg42-off-2           | GATGAAGCCGTAGCAGCCT    | AAGGAAACCCTGAAGGTGCC            |
| <i>OFD1P3Y</i> (-)       | sg42-off-3           | AGCACTCACAAACACACAATGC | GCCTGCCTAGTTTTGTAGGG            |

Predicted off-target site position is indicated with gene name (E = exonic; I = intronic; - = intergenic).

**Online Table VI. Primers for PCR of predicted off-target genomic sites.**

| Gene name    | Primer Forward (5'-3')                          | Primer reverse (5'-3')                    |
|--------------|-------------------------------------------------|-------------------------------------------|
| <i>FST</i>   | GAAGAAATATAAGAGAATTCGCCACCATGGTCCGCGCGAGGCACCAG | CCGCAGAAGGCAGCGGATCCCTACCCTCTAGAATAGAAGA  |
| <i>PEPD</i>  | GAAGAAATATAAGAGAATTCGCCACCATGGCGGCGCCACCGGACCC  | CCGCAGAAGGCAGCGGATCCCTACTTGGGGCCAGAGAAGGG |
| <i>PDGFC</i> | GAAGAAATATAAGAGAATTCGCCACCATGAGCCTCTTCGGGCTTCTC | CCGCAGAAGGCAGCGGATCCCTATCTCCTGTGCTCCCTCT  |

**Online Table VII. Primers for cloning of mRNA expression constructs.**
